# Supplementary material for: A novel ratiometric optical fiber X-ray sensor based on NaGdF4:Tb/CaAl2O4:Eu/Nd composites
Source: Royal Society of Chemistry journal article supplement (doi:10.1039/d4tc02985b), 2024-01-01
Supplement: d4tc02985b1.pdf [file d4tc02985b1.pdf]

## Supplementary Information

### A novel ratiometric optical fiber X-ray sensor based on the NaGdF<sub>4</sub>: Tb/ CaAl<sub>2</sub>O<sub>4</sub>: Eu/Nd composites

Yuqing Wang<sup>1</sup>, Su Zhou<sup>1</sup>, Jingtao Zhao<sup>1</sup>, Shiqing Xu<sup>1</sup>, Hai Guo<sup>2, \*</sup>, and Lei Lei<sup>1, \*</sup>

<sup>1</sup>Key Laboratory of Rare Earth Optoelectronic Materials and Devices of Zhejiang Province, Institute of Optoelectronic Materials and Devices, China Jiliang University, Hangzhou 310018, P. R. China

<sup>2</sup>Department of Physics, Zhejiang Normal University, Jinhua, Zhejiang 321004, P. R. China

\*E-mail: ghh@zjnu.cn; leilei@cjlu.edu.cn

#### Chemicals and materials

Gd(CH<sub>3</sub>CO<sub>2</sub>)<sub>3</sub>·xH<sub>2</sub>O (99.9%), Tb(CH<sub>3</sub>CO<sub>2</sub>)<sub>3</sub>·xH<sub>2</sub>O (99.9%), Ce(CH<sub>3</sub>CO<sub>2</sub>)<sub>3</sub>·xH<sub>2</sub>O (99.9%), Ba(CH<sub>3</sub>CO<sub>2</sub>)<sub>2</sub> (99.9%), Dy(CH<sub>3</sub>CO<sub>2</sub>)<sub>3</sub> (99.9%), Lu(CH<sub>3</sub>CO<sub>2</sub>)<sub>3</sub> (99.9%), Li(CH<sub>3</sub>CO<sub>2</sub>) (99.9%), NH<sub>4</sub>F and NaOH were purchased from Aladdin (Shanghai, China). oleic acid (OA, 90%), and 1-octadecene (ODE, 90%) were purchased from Sigma-Aldrich (Shanghai, China). ethanol (≥99.5%), cyclohexane (≥99.5%), methanol (≥99.7%) were purchased from Sinopharm Chemical Reagent Co. (Shanghai, China). Purple long afterglow luminescent powder CaAl<sub>2</sub>O<sub>4</sub>: Eu/Nd was purchased from the Foshan Xiucui Chemicals Co., Ltd. Toluene was purchased from the Hangzhou Gaojing Fine Chemical Industry Co., Ltd. Polymethyl methacrylate (PMMA) were purchased from Cool Chemical Technology (Beijing) Co., Ltd. All the chemical reagents were used as received without further purification.

#### Preparation of composite scintillator film

In a typical synthesis of NaGdF<sub>4</sub>: 15Tb, 0.65 mmol Gd(C<sub>2</sub>H<sub>3</sub>O<sub>2</sub>)<sub>3</sub>·xH<sub>2</sub>O and 0.15 mmol Tb(CH<sub>3</sub>CO<sub>2</sub>)<sub>3</sub>·xH<sub>2</sub>O were mixed with 8 mL OA in a 50 mL three-neck round-bottom flask. The resulting mixture was then heated at 150°C for 30 min to remove the water solvent, followed by the injection of ODE (12 mL), The mixture was stirred at

150°C for another 30 min before cooling down to 80°C. Subsequently, a methanol solution (10 mL) of  $\text{NH}_4\text{F}$  (3 mmol) and  $\text{NaOH}$  (2 mmol) was added. The reaction mixture was then heated at 90°C for 1h to remove the methanol. The resulting solution was heated to 280°C under  $\text{N}_2$  flow with vigorous stirring for 90 min and then cooled down to room temperature. The as-prepared nanoparticles were precipitated by addition of ethanol, collected by centrifugation at 9000 rpm for 5 min, and washed with cyclohexane and ethanol three times. The  $\text{BaLuF}_5$ : 15Tb NPs,  $\text{LiLuF}_4$ : 15Tb NPs and  $\text{NaLuF}_4$ : 15Tb/15Gd NPs were prepared via the similar procedures.

First, the PMMA toluene solution was prepared by dissolving PMMA into toluene via stirring until the solution became uniform and transparent. After that,  $\text{CaAl}_2\text{O}_4$ : Eu/Nd and  $\text{NaGdF}_4$ : 15Tb involved toluene suspension was added into 1 mL PMMA toluene solution, which was stirred for more than 2h until the solution became uniform paste like without agglomeration. Finally, the mixed liquid was evenly dropped into a mold of 30 mm\*30 mm\*1 mm and then volatilized at room temperature for 12 h until the film was formed.

### **Structural and optical characterization**

The X-ray diffraction (XRD) analysis was carried out with a powder diffractometer (Bruker D8 Advance) with a  $\text{Cu-K}_\alpha$  ( $\lambda=1.5405 \text{ \AA}$ ) radiation. The morphology and the size of the products were characterized by a field emission transmission electron microscopy (TEM, FEI, Tecnai G2 F20) and a field emission scanning electron microscopy (SEM, Hitachi, SU8010). XEOL spectra were measured by a portable fiber spectrometer (Zolix, China) with an X-ray tube (target material: W, voltage 50 kV, tube current 200  $\mu\text{A}$ ) and a photon counter (DCS210PC-9S).

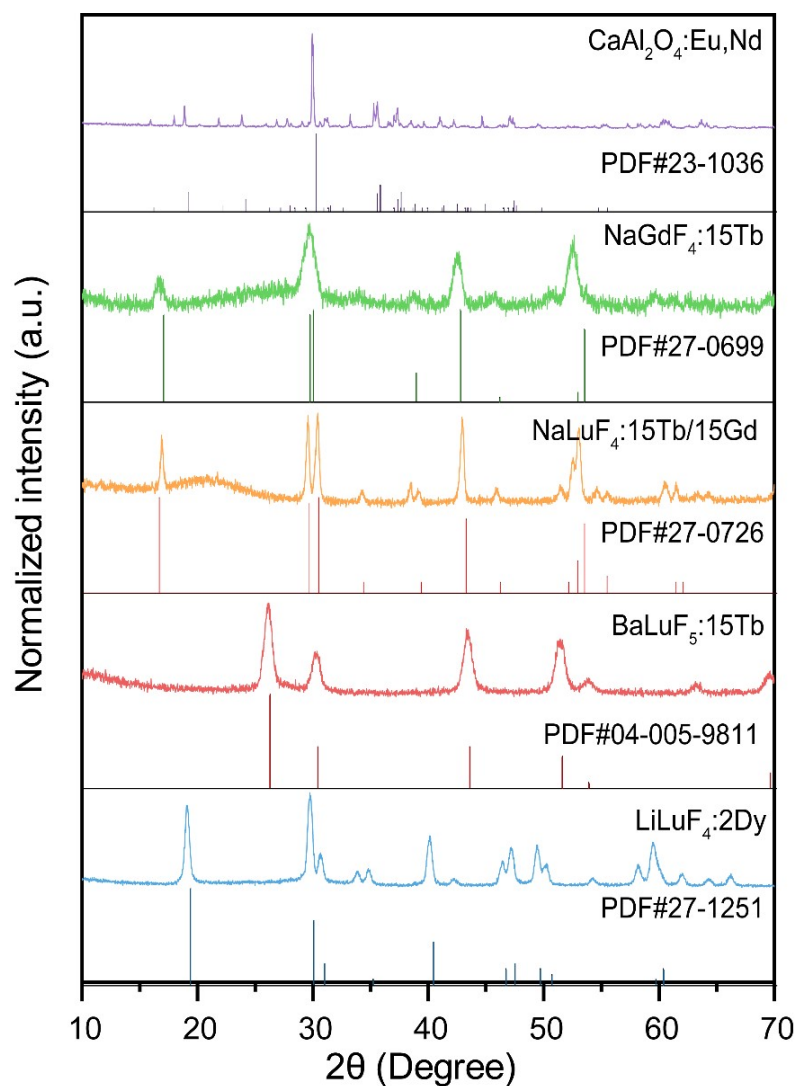

**Fig. S1** XRD patterns of the studied materials.

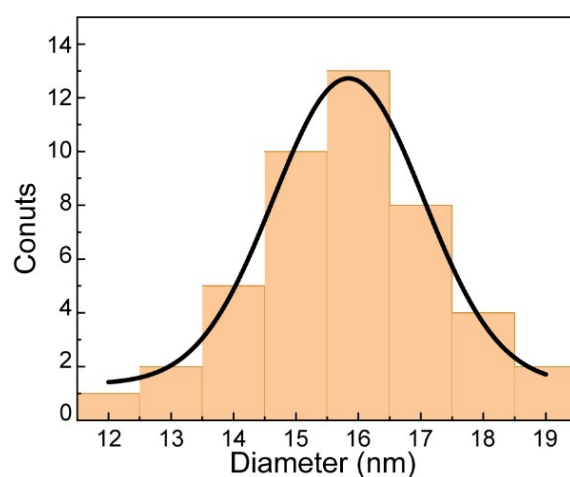

**Fig. S2** Histograms of size distributions of the as-prepared NaGdF<sub>4</sub>: 15Tb NPs.

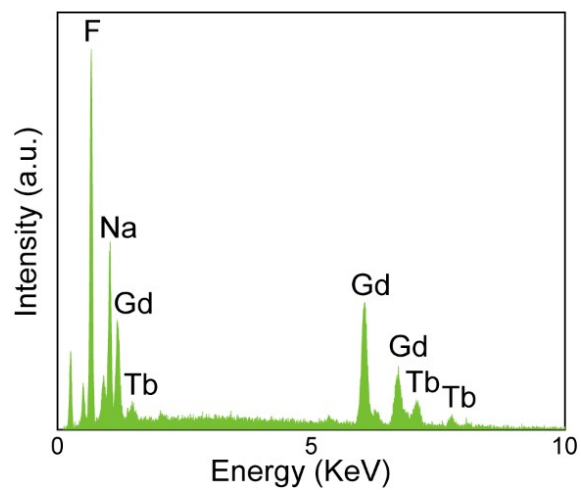

**Fig. S3** EDX spectra of the NaGdF<sub>4</sub>: 15Tb NPs.

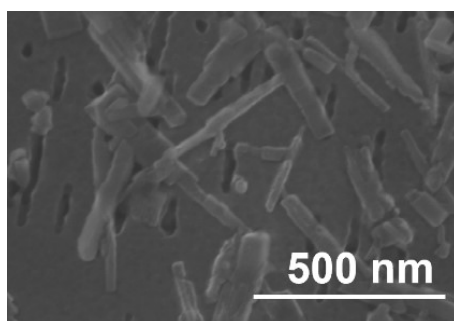

**Fig. S4** SEM image of the CaAl<sub>2</sub>O<sub>4</sub>: Eu/Nd phosphor.

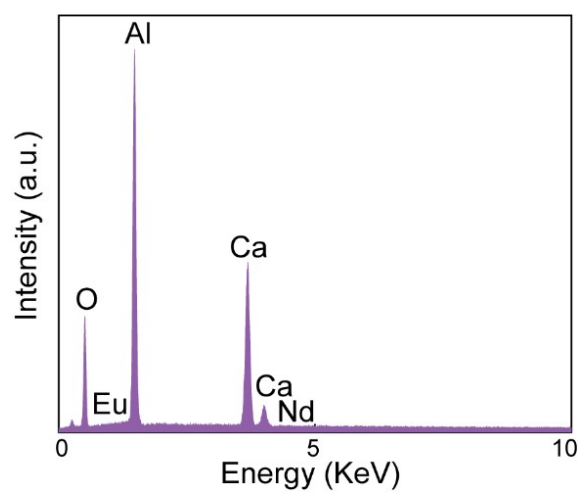

**Fig. S5** EDX spectrum of the CaAl<sub>2</sub>O<sub>4</sub>: Eu/Nd phosphor.

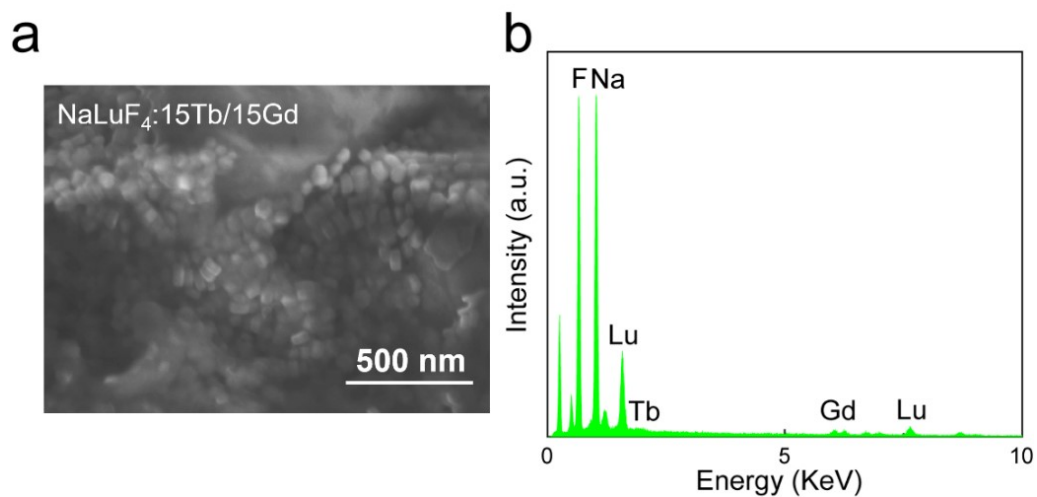

**Fig. S6** SEM image (a) and EDX spectrum (b) of the  $\text{NaLuF}_4:15\text{Tb}/15\text{Gd}$  NPs.

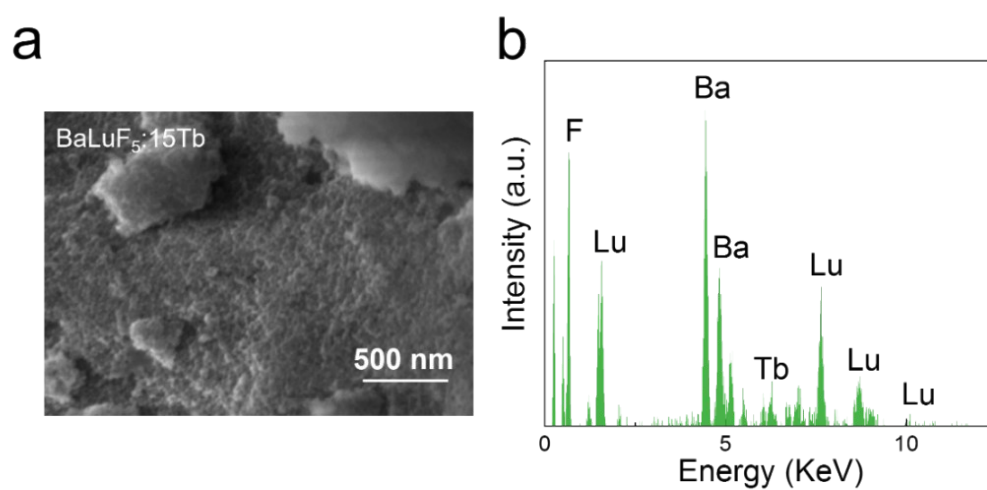

**Fig. S7** SEM image (a) and EDX spectrum (b) of the  $\text{BaLuF}_5:15\text{Tb}$  NPs.

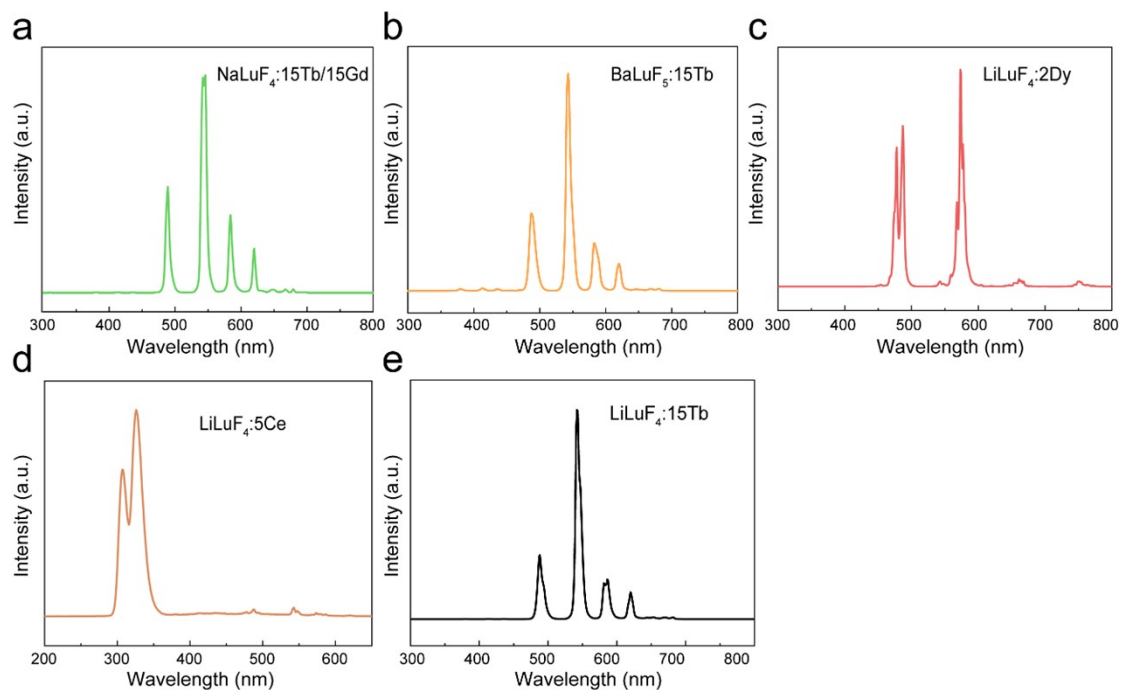

**Fig. S8** XEOL spectra of the NaLuF<sub>4</sub>: 15Tb/15Gd, BaLuF<sub>5</sub>: 15Tb, LiLuF<sub>4</sub>: 2Dy, LiLuF<sub>4</sub>: 5Ce and LiLuF<sub>4</sub>: 15Tb NPs.

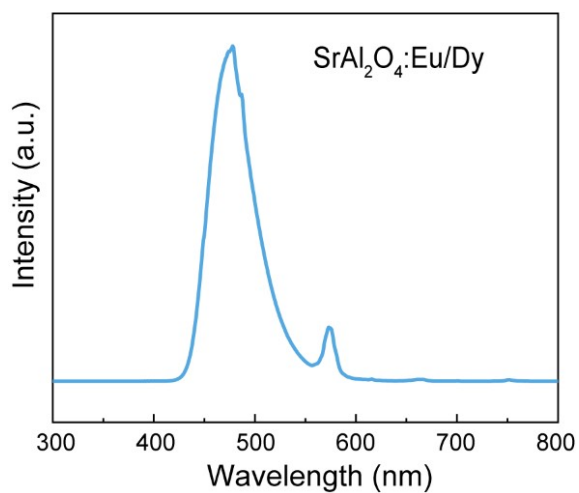

**Fig. S9** XEOL spectrum of the SrAl<sub>2</sub>O<sub>4</sub>: Eu/Dy phosphor.

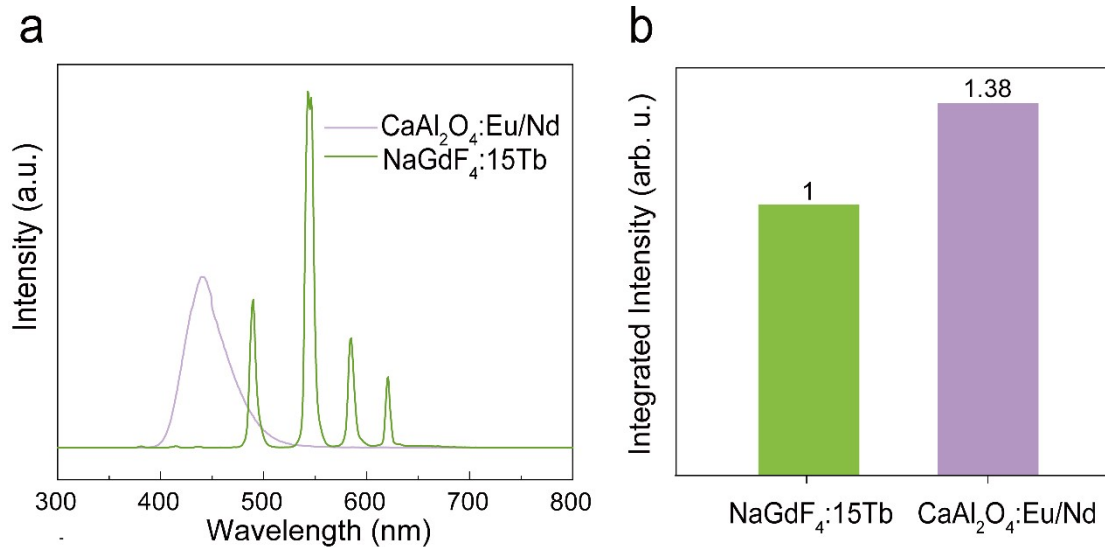

**Fig. S10 a** The XEOL intensity of NaGdF<sub>4</sub>: 15Tb NPs and CaAl<sub>2</sub>O<sub>4</sub>: Eu/Nd with the same weight (38mg). **b** Integrated XEOL intensity ratio of CaAl<sub>2</sub>O<sub>4</sub>: Eu/Nd and NaGdF<sub>4</sub>: 15Tb.

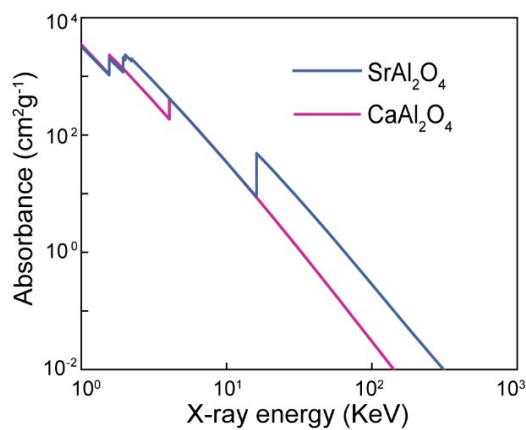

**Fig. S11** Absorption spectra of the SrAl<sub>2</sub>O<sub>4</sub> and CaAl<sub>2</sub>O<sub>4</sub> as a function of X-ray energy.

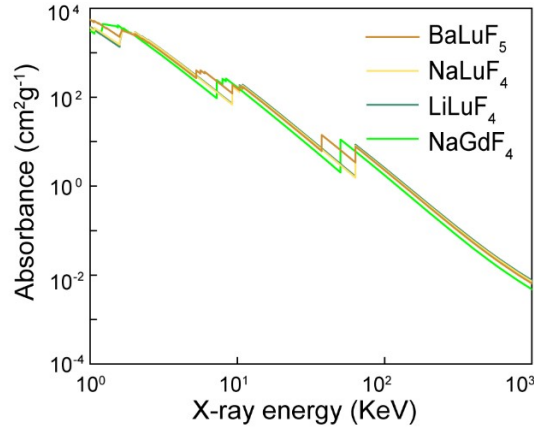

**Fig. S12** Absorption spectra of the  $\text{BaLuF}_5$ ,  $\text{NaLuF}_4$ ,  $\text{LiLuF}_4$  and  $\text{NaGdF}_4$  as a function of X-ray energy.

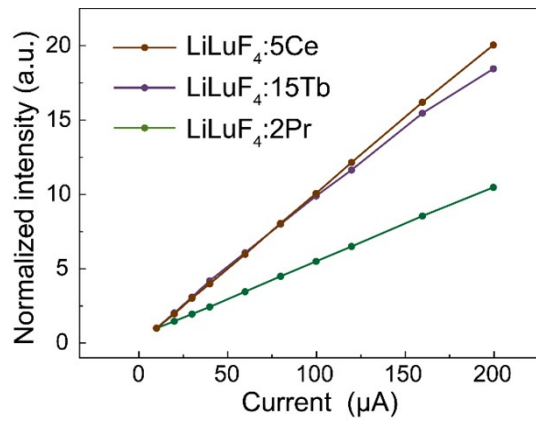

**Fig. S13** X-ray current dependent XEOL intensity variations for the  $\text{LiLuF}_4: 5\text{Ce}$ ,  $\text{LiLuF}_4: 15\text{Tb}$  and  $\text{LiLuF}_4: 2\text{Pr}$  NPs.

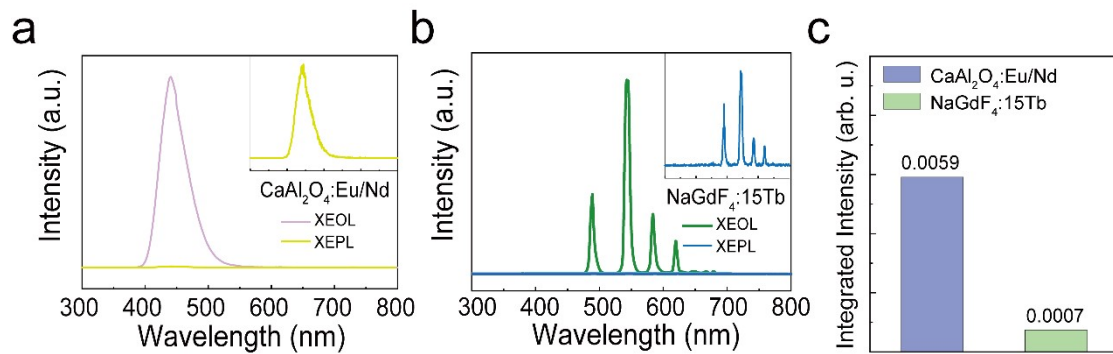

**Fig. S14 a** Compared XEOL and XEPL spectrum of the  $\text{CaAl}_2\text{O}_4: \text{Eu/Nd}$ . **b** Compared XEOL and XEPL spectrum of the  $\text{NaGdF}_4: 15\text{Tb}$ . **c** Integrated XEPL/XEOL intensity ratio of  $\text{CaAl}_2\text{O}_4: \text{Eu/Nd}$  and  $\text{NaGdF}_4: 15\text{Tb}$ .



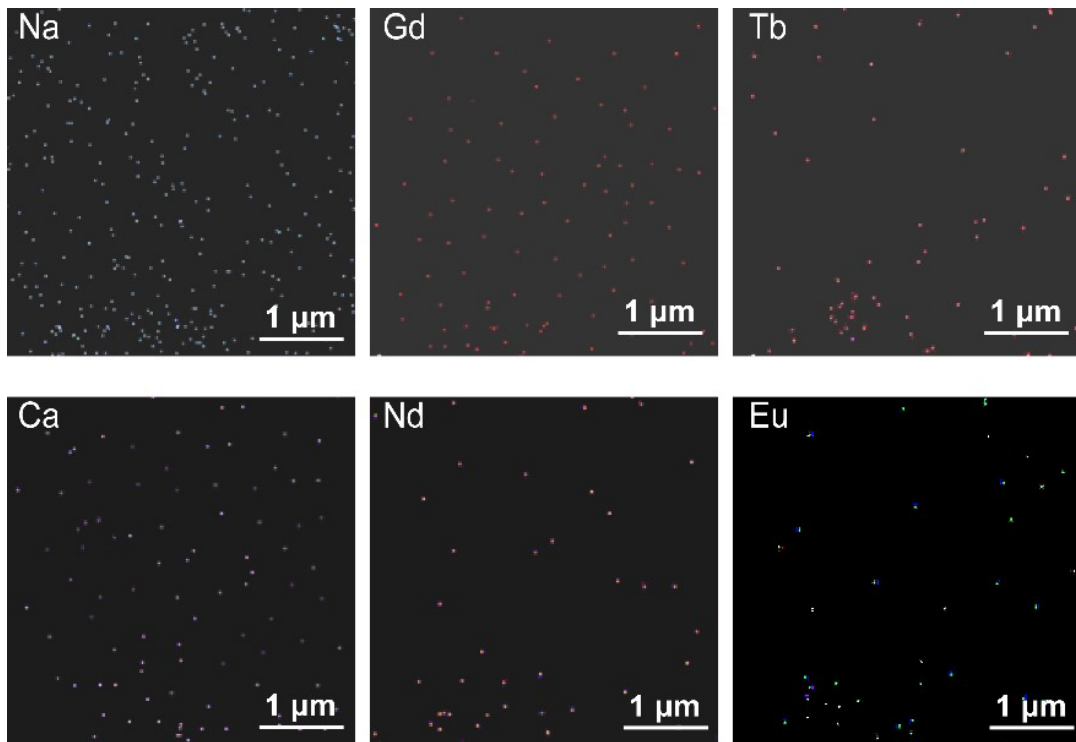

**Fig. S15** EDX-mapping results of the  $\text{NaGdF}_4: 15\text{Tb}/\text{CaAl}_2\text{O}_4: \text{Eu}/\text{Nd}$  composite scintillator film.

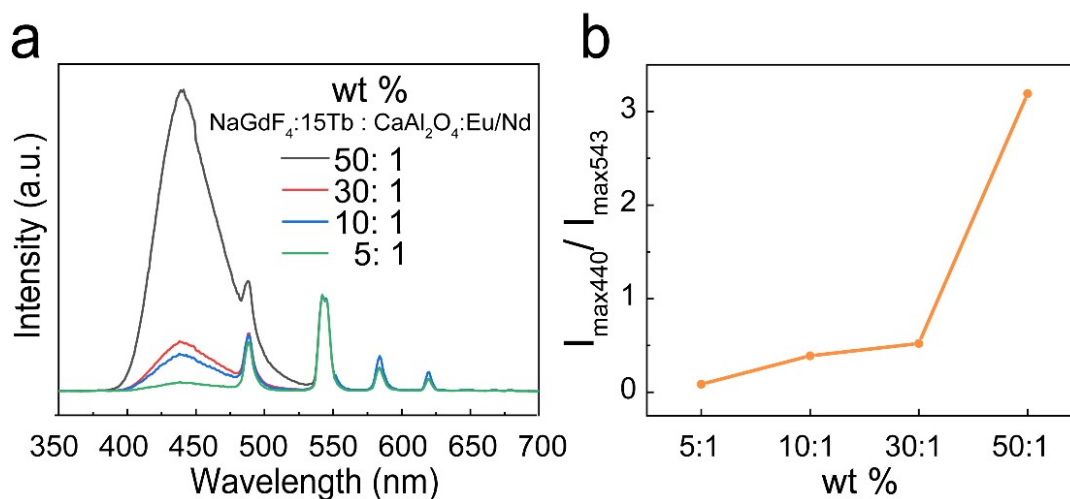

**Fig. S16 a** XEOL spectra of the composite scintillator film with different compositions. **b** the corresponding XEOL intensity ratio of Eu/Tb.

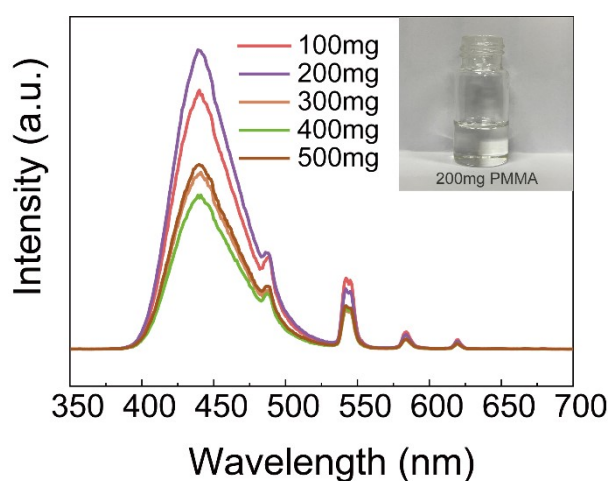

**Fig. S17** XEOL spectra of the composite scintillator film with different PMMA contents. Inset is the photograph of NaGdF<sub>4</sub>: 15Tb and CaAl<sub>2</sub>O<sub>4</sub>: Eu/Nd mixture dissolved PMMA solution.

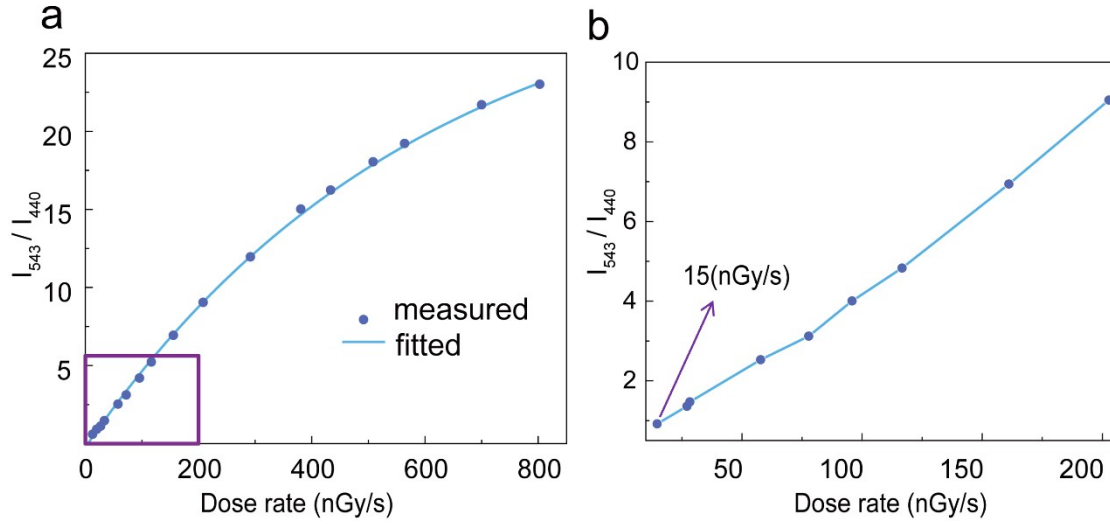

**Fig. S18** **a** Measured and fitted curve of dose rate dependent XEOL intensity ratio of  $I_{543}/I_{440}$  in the composite scintillator film. **b** enlarged figure focusing on the low-dose rate range.

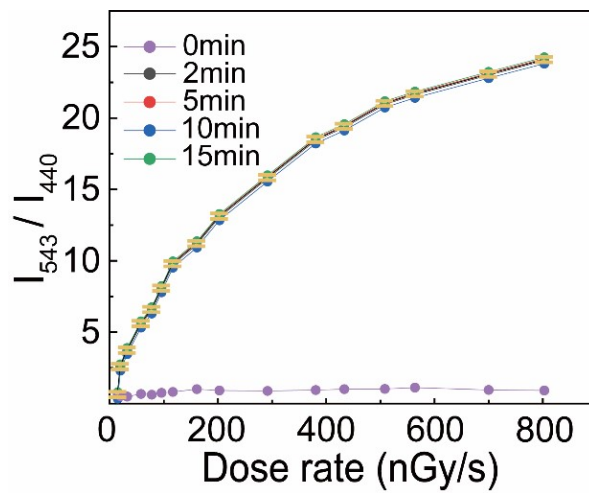

**Fig.S19** The relationship between the intensity ratio  $I_{543}/I_{440}$  and the dose rate of composite scintillator film under different X-ray irradiation time.

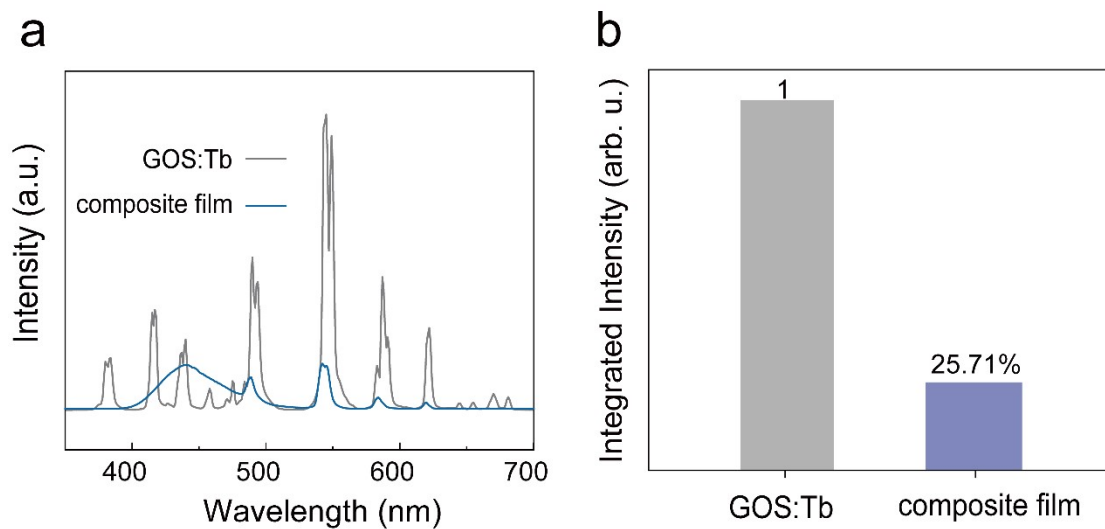

**Fig.S20 a** The XEOL intensity of GOS: Tb and composite film. **b** Integrated XEOL intensity ratio of composite film and GOS: Tb.
